# Supplementary material for: Design of electret polypropylene melt blown air filtration material containing nucleating agent for effective PM2.5 capture
Source: Royal Society of Chemistry journal article supplement (doi:10.1039/c7ra10916d), 2018-01-01
Supplement: c7ra10916d1.pdf [file c7ra10916d1.pdf]

Supplementary Information

## **Design of Electret Polypropylene Melt Blown Air Filtration Material Containing Nucleating Agent for Effective PM<sub>2.5</sub> Capture**

Haifeng Zhang, Jinxin Liu, Xing Zhang, Chen Huang and Xiangyu Jin\*

Engineering Research Center of Technical Textiles, Ministry of Education, College of Textiles, Donghua University, No. 2999 North Renmin Road, Songjiang, Shanghai 201620, China

\* Correspondence: [jinxu@dhu.edu.cn](mailto:jinxu@dhu.edu.cn) (Xiangyu Jin)

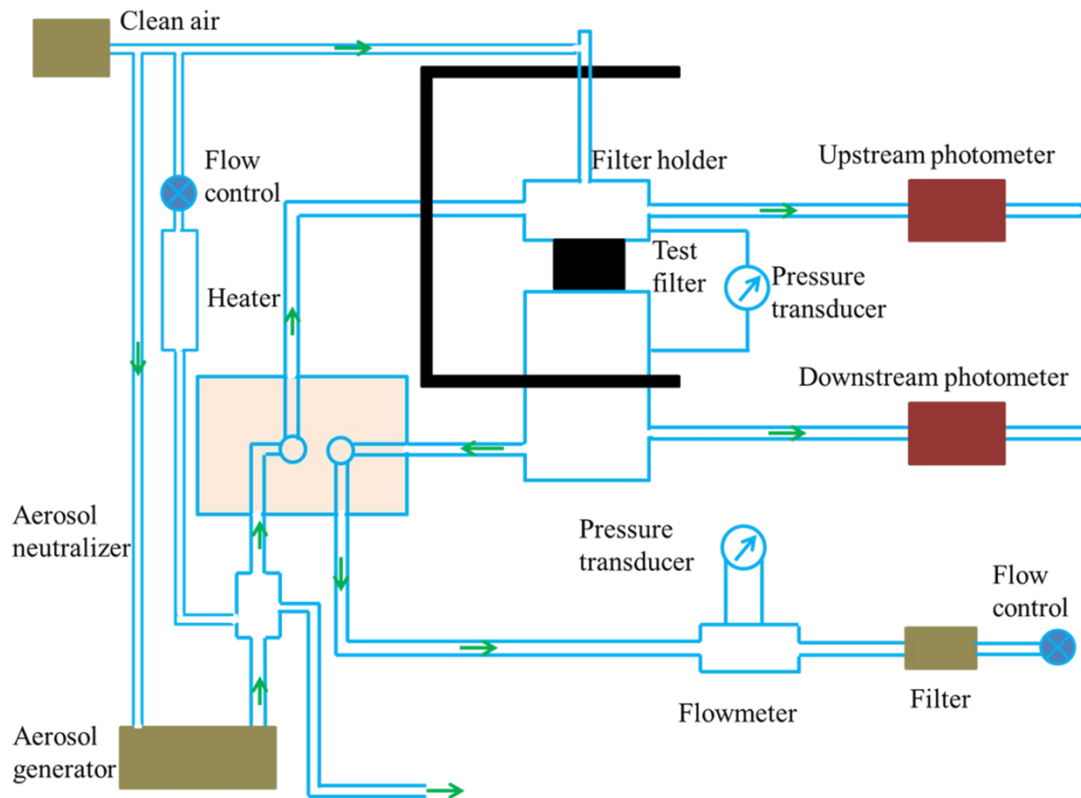

Fig. S1 Experimental setup for testing the filtration performances

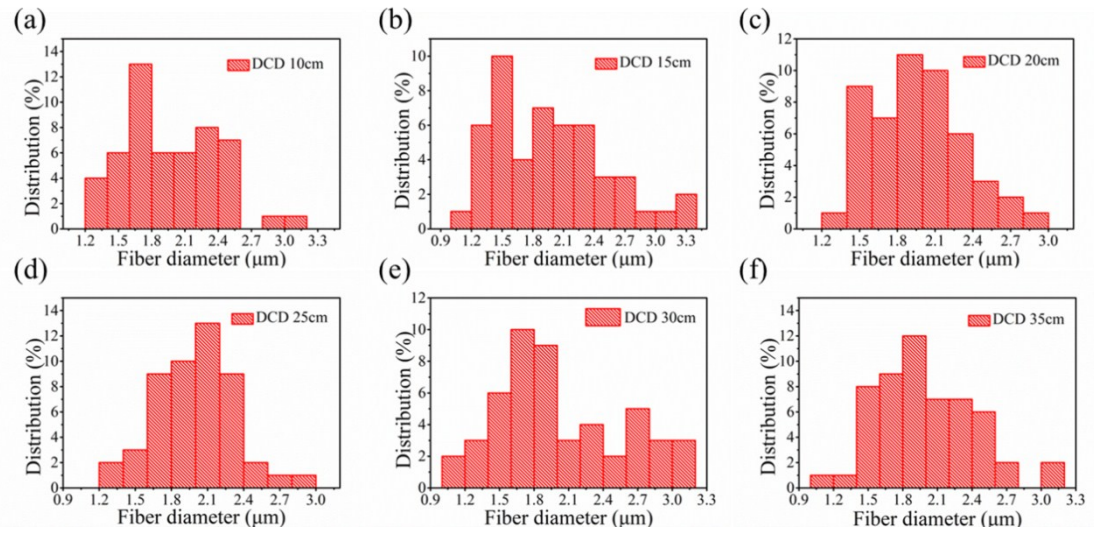

Fig. S2 The fiber diameter distribution of the PP melt blown fabricated at various DCD of (a) 10, (b) 15, (c) 20, (d) 25, (e) 30 and (f) 35 cm

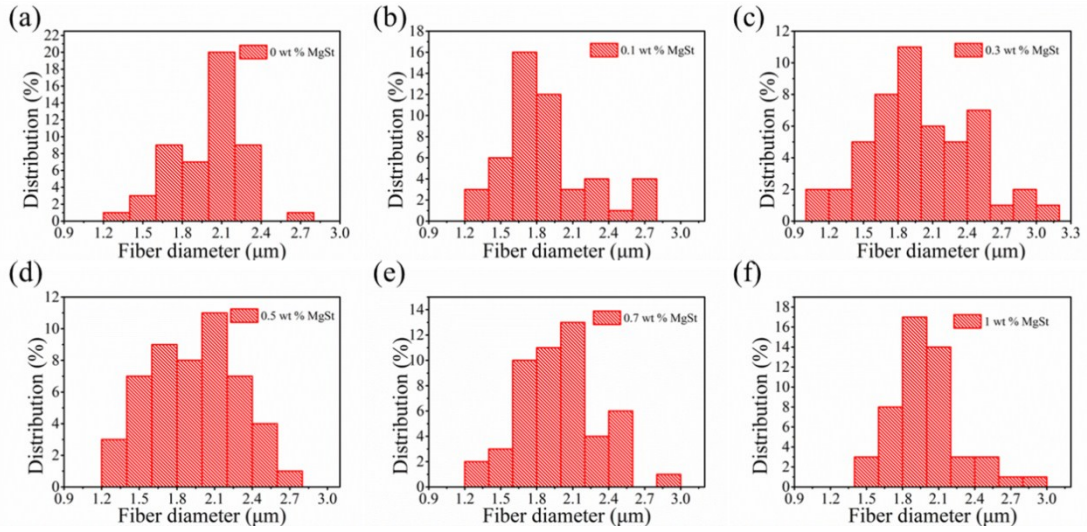

Fig. S3 The fiber diameter distribution of the PP melt blown containing various MgSt particles concentrations of (a) 0, (b) 0.1, (c) 0.3, (d) 0.5, (e) 0.7 and (f) 1 wt %

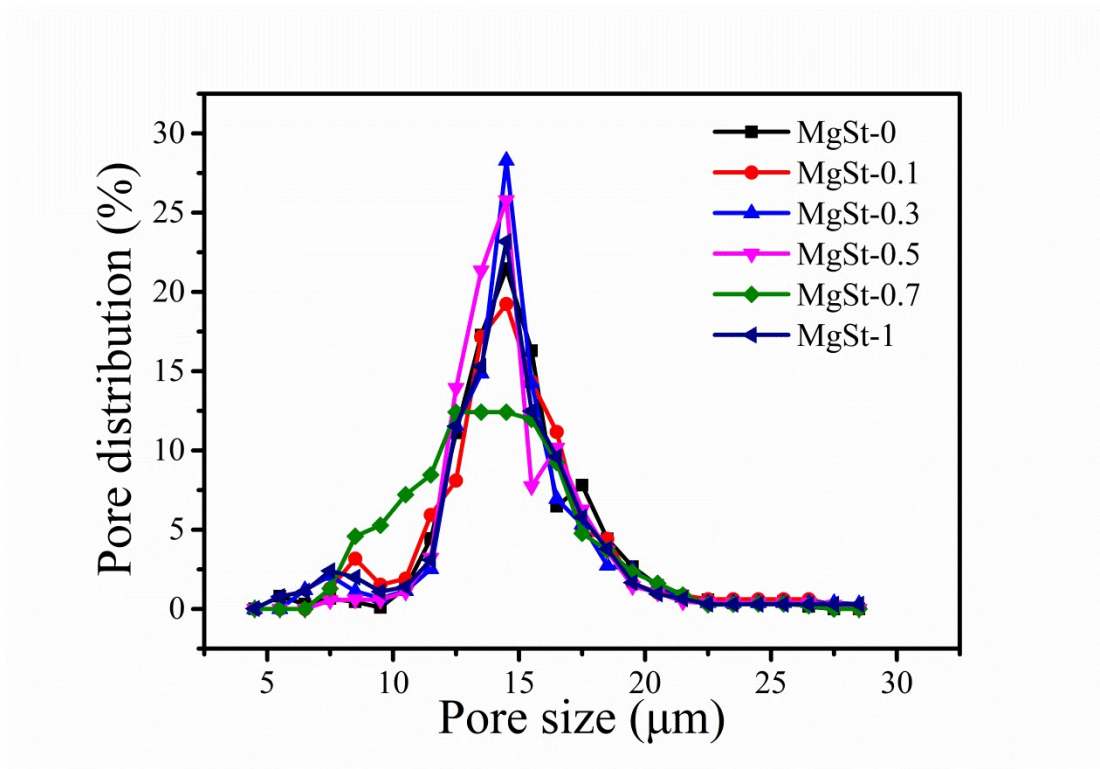

Fig. S4 The pore size distribution of the PP melt blown containing various MgSt particles concentrations of (a) 0, (b) 0.1, (c) 0.3, (d) 0.5, (e) 0.7 and (f) 1 wt %

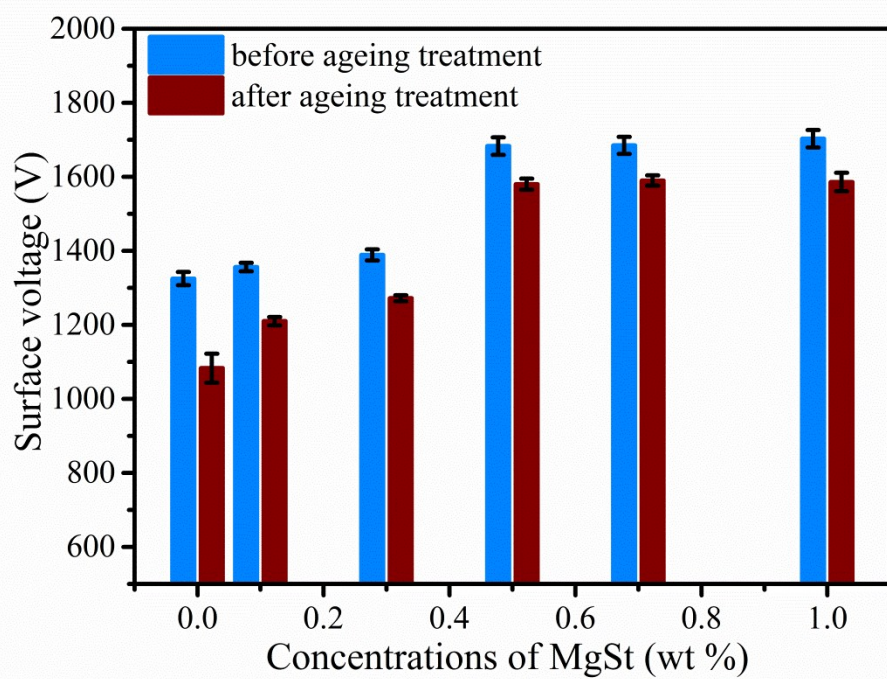

Fig. S5 The stability of the surface voltage

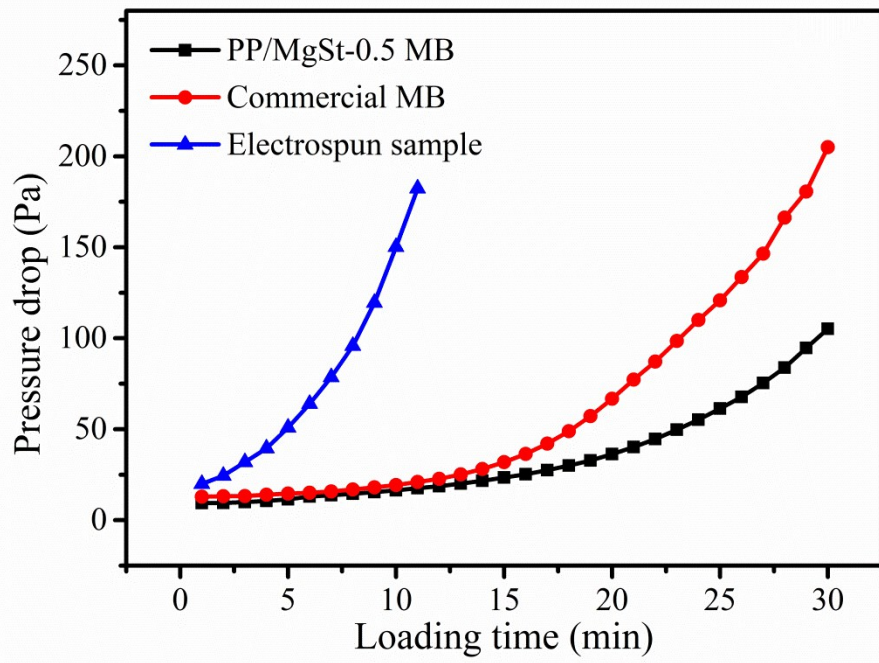

Fig. S6 The pressure drop of the different samples under loading test

Table S1 Crystal parameters of melt blown nonwovens calculated from XRD patterns

| Sample   | Crystallinity (%) | 2 $\theta$ (degrees) | D (Å) | XS (Å) |
|----------|-------------------|----------------------|-------|--------|
| MgSt-0   | 27.1              | 14.1                 | 6.268 | 100    |
|          |                   | 17.0                 | 5.213 | 129    |
| MgSt-0.1 | 31.6              | 14.0                 | 6.2   | 75     |
|          |                   | 16.9                 | 5.254 | 120    |
| MgSt-0.3 | 37.6              | 14.3                 | 6.155 | 99     |
|          |                   | 17.1                 | 5.156 | 114    |
| MgSt-0.5 | 44.2              | 14.1                 | 6.269 | 81     |
|          |                   | 17.0                 | 5.212 | 103    |
| MgSt-0.7 | 45.6              | 14.1                 | 6.26  | 83     |
|          |                   | 17.1                 | 5.213 | 119    |
| MgSt-1   | 46.1              | 14.1                 | 6.313 | 85     |
|          |                   | 17                   | 5.263 | 122    |



Table S2 Basic characteristics of the the commercial melt blown nonwovens and electrospun samples

| Sample                | Material          | Thickness<br>(mm) | Basis weight<br>(g/m <sup>2</sup> ) | Fiber diameter<br>(μm) | Porosity<br>(%) |
|-----------------------|-------------------|-------------------|-------------------------------------|------------------------|-----------------|
| Commercial melt blown | Polypropylene     | 0.41 ± 0.05       | 40.0 ± 0.2                          | 1.98 ± 0.15            | 89.3            |
| electrospun           | polyacrylonitrile | 0.05 ± 0.02       | 8.2 ± 0.2                           | 0.36 ± 0.05            | 86.1            |
